# Supplementary material for: Collapse-induced phase transitions in binary interfacial microgel monolayers
Source: Royal Society of Chemistry journal article supplement (doi:10.1039/d1sm00318f), 2021-01-01
Supplement: d1sm00318f1.pdf [file d1sm00318f1.pdf]

## Supplementary Information

# Collapse-induced phase transitions in binary interfacial microgel monolayers

Johannes Harrer<sup>a,\*</sup>, Simone Ciarella<sup>b,\*</sup>, Marcel Rey<sup>a,c</sup>, Hartmut Löwen<sup>d</sup>, Liesbeth M.C. Janssen<sup>b,\*</sup>,  
Nicolas Vogel<sup>a\*</sup>

<sup>a</sup> Institute of Particle Technology, Friedrich-Alexander University Erlangen-Nürnberg,  
Cauerstrasse 4, 91058 Erlangen, Germany

<sup>b</sup> Soft Matter and Biological Physics, Department of Applied Physics, Eindhoven University of  
Technology, 5600 MB Eindhoven, The Netherlands

<sup>c</sup> Department of Physics and Astronomy, The University of Edinburgh,  
Mayfield Road, Edinburgh EH9 3JZ, UK.

<sup>d</sup> Institute for Theoretical Physics II: Soft Matter, Heinrich-Heine University Düsseldorf, D-40225  
Düsseldorf, Germany

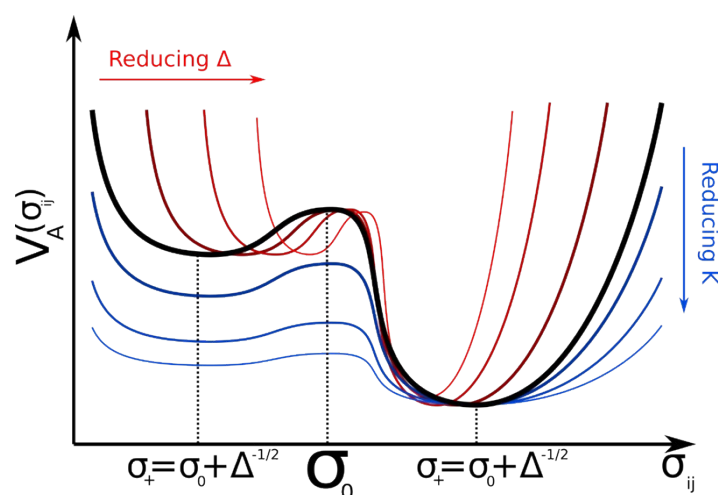

Figure S1: Effect of the size Delta and the stiffness K over the augmented potential defined in eq.1 . To model different particle types, we select Delta (and  $\sigma_0$ ) that reproduces the experimental sizes. The stiffness K controls which type of particle collapses first because it tunes the energy barrier between the expanded ( $\sigma_{ij}=\sigma_+$ ) and the collapsed ( $\sigma_{ij}=\sigma_0$ ) states.

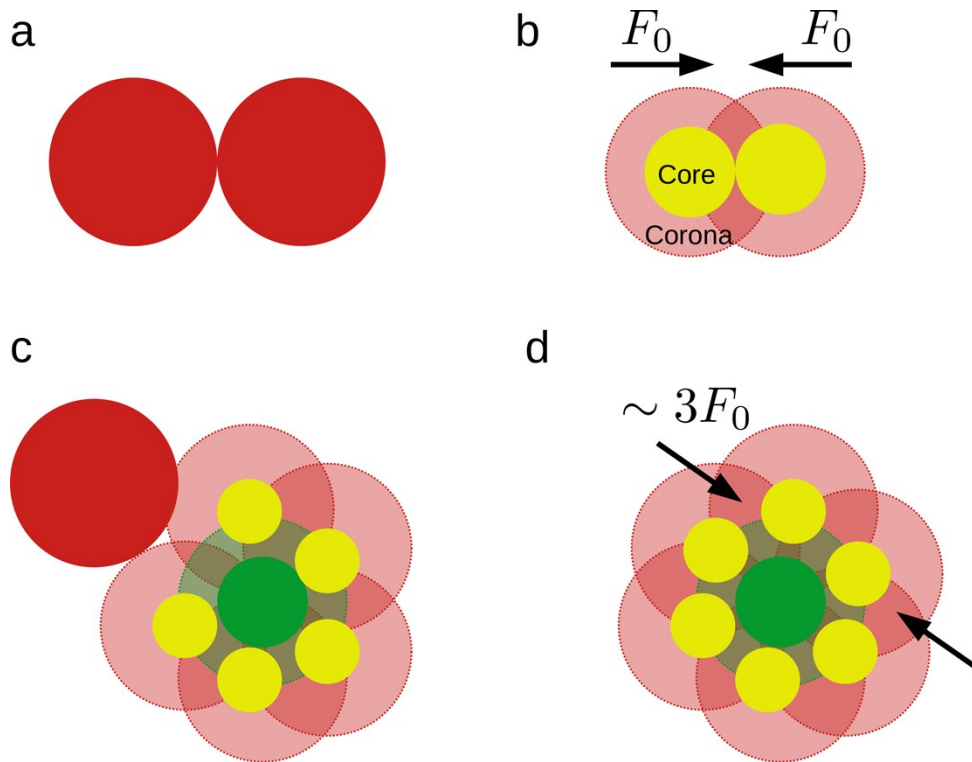

Figure S2: Flower-like defects in simulations. A force of magnitude  $F_0$  is required to compress a pair of microgels (a) into core-core contact (b). However, a much larger force is required to create a perfect flower-like defect, because it requires simultaneously many corona-corona overlaps. For example, to add the last petals to the flower in (c), the pushing force has to compress at least 3 corona-corona contacts, so the force has to be at least  $3F_0$ . In the manuscript, we partially facilitate the formation of such defects, by using the augmented potentials with additional many-body interactions that make the collapsed particles (the first petals) more likely to collapse again, thus lowering the energy required to add petals to the flower.

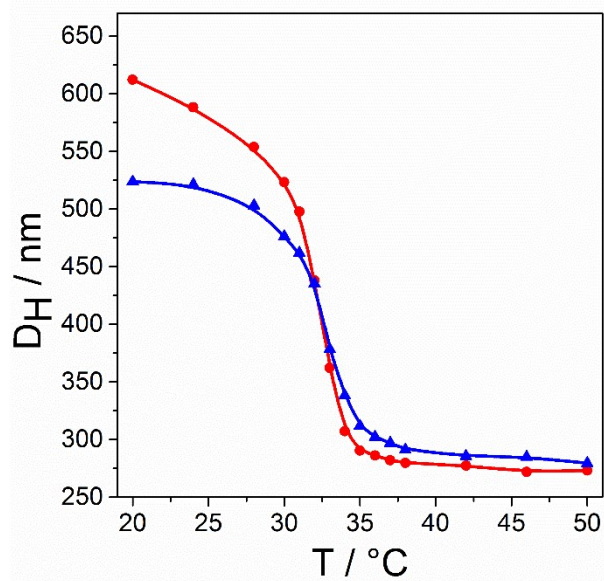

Figure S3: Hydrodynamic diameter ( $D_H$ ) as a function of temperature measured by dynamic light scattering (DLS) for PNIPAm microgels with 2.5 mol% BIS (red) and 5.0 mol% BIS (blue) as crosslinker.

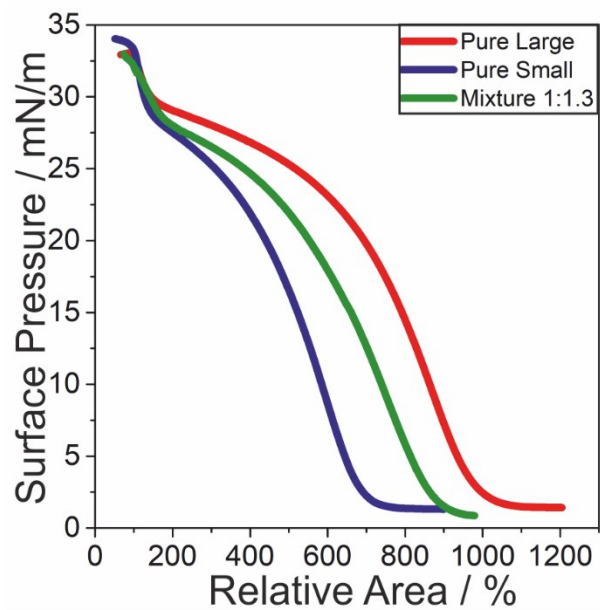

Figure S4: Surface pressure-area isotherms of the pure small and large microgels as well as a 1:1.3 mixture.

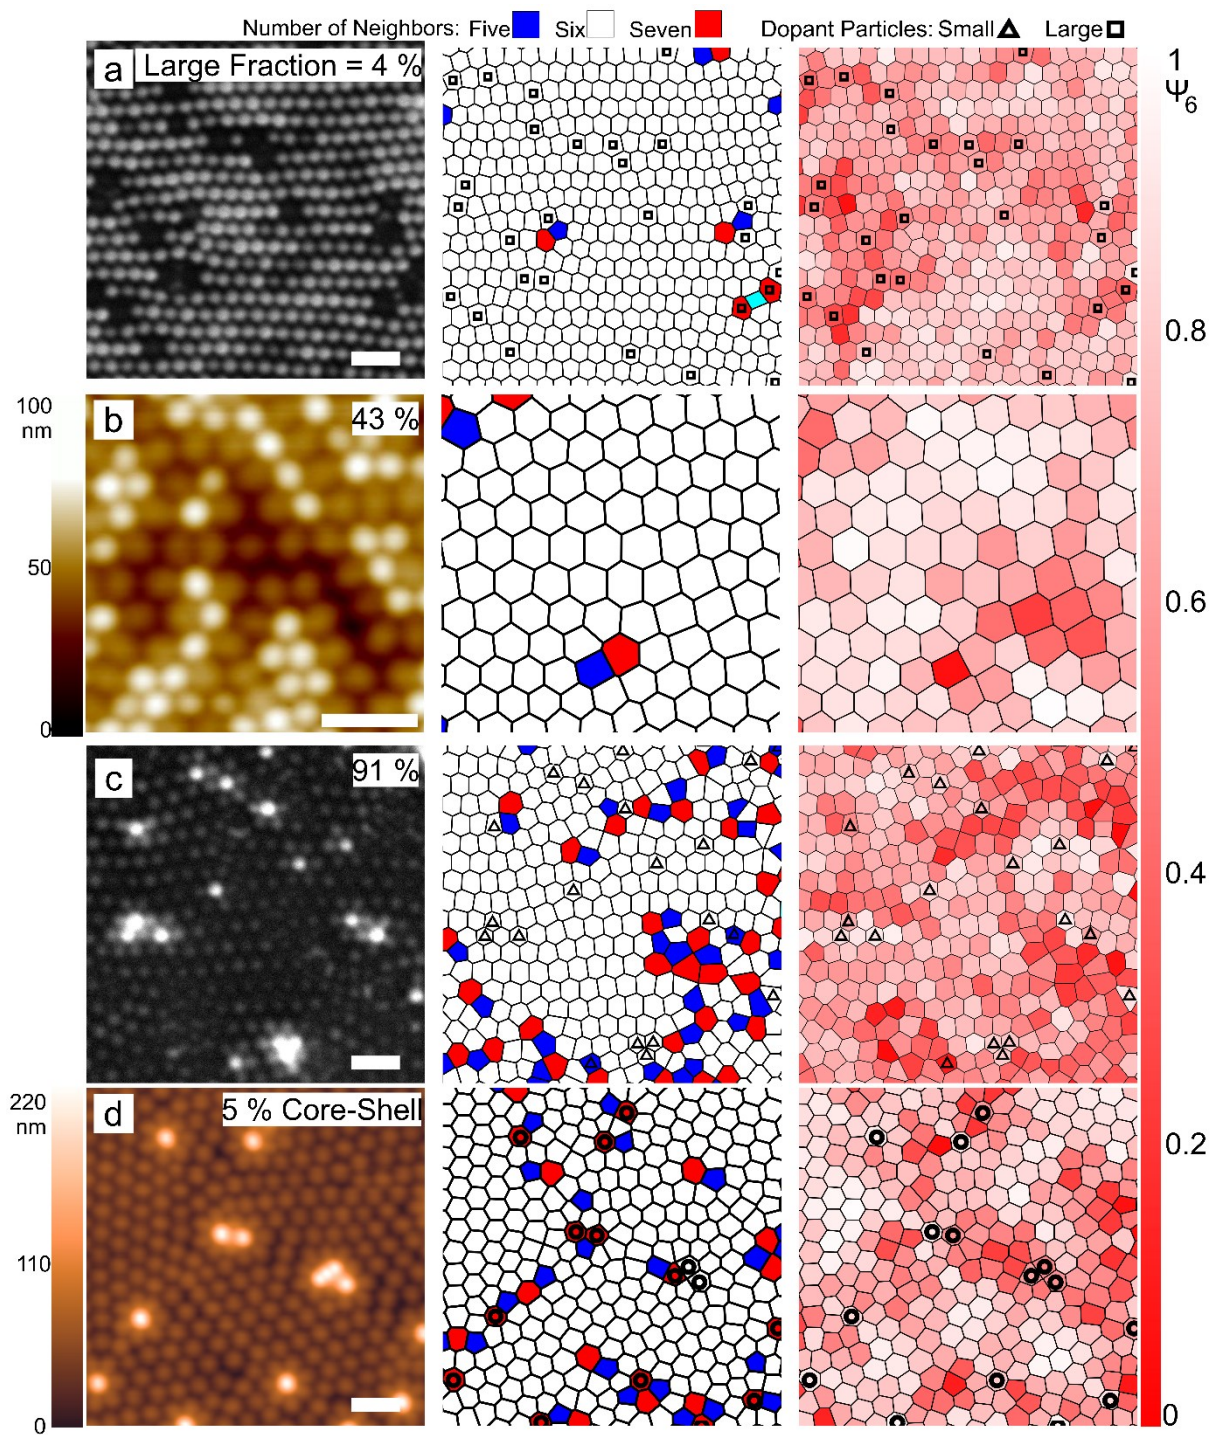

Figure S5: Scanning electron microscopy and atomic force microscopy images of close-packed monolayers at different mixing ratios with corresponding Voronoi tessellations colored according to number of neighbors and  $\Psi_6$  parameters. a) Ratio large:small = 1:24, b) Ratio large:small = 1:1.3, c) Ratio large:small = 10:1, d) Ratio microgel:core-shell = 19:1. Scale bar = 1  $\mu\text{m}$ .
